# Supplementary material for: The Effect of Anorthite Content and Water on Quartz–Feldspar Cotectic Compositions in the Rhyolitic System and Implications for Geobarometry
Source: Oxford University Press journal article supplement (doi:10.1093/petrology/egx034), 2017-04-01
Supplement: Appendix_Tables_egx034.xlsx [file Appendix_Tables_egx034.xlsx]

## Sheet: ApTable 1
Microprobe and IR analyses of the chemical composition of starting glasses
Name	HYS1		HYS2		HYS3		HYS4		HYS5		HYS6		HYS7		HYS8		HYS15		HYS16		HYS17		HYS18		HYS19		HYS20		HYS21		HYS22		HYS23		HYS24		HYS25		HYW1		HYW2		HYW3		HYW4		HYW5		HYW6
	[wt.%]	1σ	[wt.%]	1σ	[wt.%]	1σ	[wt.%]	1σ	[wt.%]	1σ	[wt.%]	1σ	[wt.%]	1σ	[wt.%]	1σ	[wt.%]	1σ	[wt.%]	1σ	[wt.%]	1σ	[wt.%]	1σ	[wt.%]	1σ	[wt.%]	1σ	[wt.%]	1σ	[wt.%]	1σ	[wt.%]	1σ	[wt.%]	1σ	[wt.%]	1σ	[wt.%]	1σ	[wt.%]	1σ	[wt.%]	1σ	[wt.%]	1σ	[wt.%]	1σ	[wt.%]
SiO2	75.3451	0.632519	75.0446	0.540578	71.4464	0.430088	75.8403	0.221171	72.6655	0.623103	69.118	0.66223	70.1722	0.236741	72.891	0.346295	78.2825	0.494064	78.7098	0.738277	77.0114	0.469752	74.6101	0.292396	74.2175	0.220597	72.0775	0.304939	73.0124	0.243158	80.8297	0.433076	79.3659	0.394479	77.1154	0.389204	78.6498	0.167662	79.5052	0.347348	78.4775	0.319866	72.6466	0.323696	76.4756	0.31026	76.5975	0.388817	75.7987
TiO2	0.419429	0.0379268	0.415405	0.0384236	0.444267	0.0195405	0.412365	0.0196144	0.423637	0.0321332	0.403661	0.03471	0.429535	0.0174238	0.419371	0.0202994	0.41123	0.0260121	0.411577	0.0280471	0.411381	0.0190729	0.414606	0.0187721	0.420748	0.0153051	0.439781	0.0140558	0.443485	0.0174536	0.415323	0.0206885	0.422356	0.0178341	0.430074	0.0189034	0.417424	0.0153182	0.21481	0.0144566	0.211008	0.0184401	0.219648	0.0148002	0.214122	0.014856	0.222324	0.0172809	0.222819
Al2O3	12.185	0.228084	12.0101	0.233005	14.7636	0.116493	12.0943	0.107917	13.3565	0.206907	16.4045	0.255455	15.4844	0.127081	14.438	0.104237	10.7926	0.142759	9.71931	0.207541	10.8409	0.115337	12.0482	0.10221	11.8401	0.0867001	13.1942	0.107995	13.3268	0.144549	9.9552	0.10039	10.3144	0.133558	12.8086	0.110782	11.3954	0.0834018	10.5836	0.153116	10.3711	0.126265	13.8278	0.154201	11.5946	0.117626	12.2416	0.192299	12.0594
FeO	2.17362	0.227952	2.00758	0.258061	1.59186	0.393172	2.60485	0.0966972	2.23302	0.341497	1.9779	0.227232	2.27214	0.196902	1.9089	0.0970917	1.58935	0.316005	1.90757	0.634833	1.74422	0.533462	1.76168	0.168776	2.38321	0.138252	2.37251	0.089531	2.34436	0.136292	2.11764	0.434045	2.03332	0.322833	1.74698	0.389433	2.35479	0.0922575	0.934019	0.113077	1.24671	0.109227	1.14169	0.0784048	0.957886	0.124153	0.948586	0.23758	1.14036
CaO	1.40778	0.135256	1.33958	0.0676406	1.33685	0.0462857	1.36034	0.0334247	1.39825	0.0778608	1.38628	0.085068	1.38151	0.03234	1.40145	0.0333244	1.35289	0.0685097	1.3801	0.0674907	1.3646	0.0487833	1.37213	0.0365698	1.3705	0.0387558	1.36633	0.0257696	1.35032	0.0335921	1.3486	0.0702103	1.38441	0.0499988	1.37014	0.0485492	1.3894	0.0372816	0.69873	0.0232208	0.694547	0.033815	0.69526	0.0284745	0.684747	0.0286834	0.670349	0.0406823	0.703515
Na2O	3.78644	0.172795	1.42249	0.10232	2.35573	0.113527	2.55208	0.0902684	1.94016	0.139681	5.51636	0.200494	3.81677	0.117838	4.45175	0.123853	2.02531	0.107274	0	0	0.745262	0.0609824	0	0	0.762817	0.0481177	1.24283	0.0764365	3.08909	0.0967275	4.37626	0.140326	3.20504	0.0981942	5.88432	0.198325	5.00933	0.181888	3.12741	0.121476	1.16055	0.0841981	2.28716	0.117851	0	0	2.7949	0.128905	1.70221
K2O	3.17301	0.0763374	6.62606	0.106061	7.48498	0.103567	4.98865	0.0732657	6.93956	0.0794654	4.4761	0.0883338	5.93316	0.0844061	3.89896	0.0433067	4.47318	0.082499	6.59686	0.127162	6.6881	0.0828118	8.83939	0.094974	7.67997	0.0735565	8.02311	0.0691404	5.21045	0.0624729	0	0	2.20355	0.0515336	0	0	0	0	3.63311	0.0752847	6.52098	0.103789	7.99019	0.0970985	8.8034	0.0804555	5.80794	0.0877725	7.21864
Total	98.4904	1.51087	98.8658	1.34609	99.4237	1.22267	99.8529	0.642358	98.9566	1.50065	99.2828	1.55352	99.4898	0.812732	99.4095	0.768408	98.9271	1.23712	98.7253	1.80335	98.8058	1.3302	99.0461	0.713697	98.6749	0.621284	98.7163	0.687867	98.7769	0.734245	99.0427	1.19874	98.929	1.06843	99.3556	1.1552	99.2161	0.577809	98.6969	0.847979	98.6824	0.795601	98.8084	0.814526	98.7862	0.709846	99.2832	1.09334	98.8456
n	30		30		40		36		30		30		40		40		60		60		25		31		20		20		20		19		20		19		20		40		40		40		25		40		20
H2O	1.23333		1.27		1.44002		0.998965		1.34		1.12333		1.31516		1.33935		1.32257		1.37786		1.48638		1.36074		1.44175		1.43326		1.36378				1.45349		1.29597		1.33004		1.32287		1.54561		1.18403		1.45392		1.32173		1.39498
Qz	36.7391		37.2268		25.2729		37.1937		30.3363		15.6511		20.7878		27.8395		45.5017		49.2689		43.1121		36.7306		35.9694		29.6373		30.6466		51.0838		47.995		38.8589		44.9455		45.3081		44.4238		26.505		40.7147		36.0651		35.9986
Ab	32.0412		12.0372		19.9344		21.5959		16.4178		46.6799		32.2979		37.6711		17.1384		0		6.30647		0		6.45502		10.517		26.1402		37.0322		27.1213		49.7937		42.3893		26.4644		9.8207		19.3542		0		23.6506		14.4043
Or	18.7524		39.1598		44.236		29.4828		41.0126		26.4536		35.0649		23.0428		26.4364		38.9873		39.5265		52.2405		45.3885		47.4164		30.7937		0		13.0229		0		0		21.4716		38.5388		47.2218		52.0078		34.3248		42.662
An	6.88073		6.64581		6.63229		6.74881		6.93692		6.78021		6.85386		6.95275		6.71185		6.84684		6.4822		6.76787		6.20041		6.72711		6.6991		6.69057		6.86824		6.79745		6.89298		3.46649		3.44574		3.44927		3.37357		3.32569		3.49023
aCor	-0.0379118		0.0623417		0.355872		0.0229358		0.111152		-0.0356605		0.271682		0.346373		0.159295		0.0695281		-0.105452		-0.014455		-0.21945		-0.0188521		0.150124		0.304149		0.139759		0.637555		0.628714		0.235962		0.140729		0.152523		0.832931		0.138444		0.166452
n = number of analyses, Qz = normative quartz content calculated by CIPW-norm, Ab = albite , Or = orthoclase , An = anorthite, Cor = corundum, calc. = composition of mixture known only from stoichiometrical calculation
a negative corundum values reflect the amount of corundum that is missing to convert all available CaO to anorthite
b calculated composition of glass powder mixture
c for detailed description see Wilke et al., 2015
[truncated: 29 more columns]

## Sheet: ApTable 2
Microprobe analyses of the composition of glasses in experimental conditions A
Name	YX90		YX91		YX92		YX93		YX94		YX95		YX96		YX97		YX98		YX99		YX100		YX101		YX102		YX103		YX104		YX105		YX122		YX123		YX124		YX125		YX126		YX127		YX128		YX129		YX130
SM	HYW1		HYW2		HYW3		HYW4		HYW5		HYW6		HYW7		HYW8		HYW1		HYW2		HYW3		HYW4		HYW5		HYW6		HYW7		HYW8		HYW1		HYW2		HYW3		HYW4		HYW5		HYW6		HYW7		HYW8		HYW1
	[wt.%]	1σ	[wt.%]	1σ	[wt.%]	1σ	[wt.%]	1σ	[wt.%]	1σ	[wt.%]	1σ	[wt.%]	1σ	[wt.%]	1σ	[wt.%]	1σ	[wt.%]	1σ	[wt.%]	1σ	[wt.%]	1σ	[wt.%]	1σ	[wt.%]	1σ	[wt.%]	1σ	[wt.%]	1σ	[wt.%]	1σ	[wt.%]	1σ	[wt.%]	1σ	[wt.%]	1σ	[wt.%]	1σ	[wt.%]	1σ	[wt.%]	1σ	[wt.%]	1σ	[wt.%]
SiO2	77.8368	0.166656	77.4804	0.284963	74.2567	0.572916	76.033	0.138648	76.4895	0.192755	76.2127	0.175614	77.304	0.315123	75.394	0.328432	78.065	0.432732	77.8129	0.508723	73.6609	0.266048	76.1821	0.253753	76.3195	0.281364	75.962	0.285694	77.8984	0.309918	74.2661	0.405192	75.953	0.166897	76.56	0.4143	74.0673	0.332632	76.1469	0.254181	75.9852	0.223255	75.7247	0.24595	76.4338	0.33857	76.0491	0.396454	75.8161
TiO2	0.23509	0.0142792	0.225674	0.0139175	0.228722	0.0180004	0.214736	0.0107281	0.216757	0.0120247	0.231802	0.0170511	0.215417	0.0120597	0.24694	0.012453	0.227722	0.0127549	0.226553	0.0172771	0.21891	0.00939501	0.208186	0.0134402	0.229562	0.00350907	0.211376	0.0102462	0.210102	0.0162343	0.22674	0.0163663	0.247218	0.0180047	0.221259	0.0177274	0.240552	0.0128256	0.212799	0.016818	0.217395	0.0136329	0.220591	0.0161669	0.211542	0.0126329	0.245908	0.0217496	0.249527
Al2O3	11.8218	0.115319	11.2732	0.132327	13.4449	0.119327	11.5804	0.0803894	12.2086	0.128273	11.9905	0.0810372	11.1996	0.0859197	13.0899	0.115243	11.4476	0.102041	10.8093	0.194732	13.9811	0.214075	11.5935	0.0300671	12.2851	0.103229	12.066	0.0713187	10.9399	0.0971177	13.6543	0.156522	11.7083	0.0932294	11.0589	0.298885	12.8061	0.108316	11.5605	0.0915665	12.0212	0.137994	12.0457	0.111293	11.3207	0.155068	12.4126	0.190279	11.7443
FeO	1.07541	0.124807	1.01479	0.0831232	1.01544	0.0725558	0.960305	0.0526369	0.918721	0.0790124	0.781775	0.0578432	0.929262	0.0709406	0.9602	0.0740193	0.888348	0.130319	0.974949	0.0777171	0.754405	0.025957	0.787542	0.0797599	0.893631	0.0314769	0.758644	0.0513365	0.887533	0.0317543	0.745544	0.102363	1.20052	0.0700975	0.932544	0.0703149	0.948053	0.0844838	0.743308	0.100564	1.01119	0.0676315	0.781419	0.0531633	0.816732	0.161773	1.0642	0.128083	1.24723
CaO	0.697855	0.029224	0.769	0.0351896	0.7245	0.0210871	0.70335	0.0211168	0.716217	0.0246692	0.727389	0.0158258	0.72018	0.02826	0.392886	0.0202876	0.779546	0.0234988	0.774215	0.0479521	0.717392	0.0254173	0.689433	0.0221714	0.716525	0.0156224	0.685456	0.0199284	0.689655	0.0340909	0.503642	0.0259453	0.586654	0.0276347	0.703001	0.0577011	0.686614	0.0318426	0.688325	0.0224825	0.551379	0.0187362	0.688619	0.024258	0.721325	0.0297254	0.366102	0.0262487	0.487069
Na2O	3.70775	0.20477	1.27297	0.110071	2.33545	0.108874	0	0	2.81917	0.147498	1.75339	0.0670583	0.668337	0.0422533	4.42296	0.131011	3.49822	0.127721	1.19645	0.0623229	2.31439	0.128115	0	0	2.83808	0.0491741	1.73075	0.11275	0.613491	0.0486967	4.76535	0.104348	3.35406	0.141674	1.18029	0.070173	2.13499	0.0812558	0	0	2.54767	0.0708868	1.65298	0.103793	0.603517	0.0614364	3.70237	0.102184	3.32636
K2O	4.22701	0.0732571	7.04418	0.0609809	7.45246	0.0974862	8.6119	0.0521141	5.82366	0.0893563	7.26752	0.0709252	7.76402	0.0935938	4.75579	0.0465494	3.90261	0.0616996	6.75054	0.0944219	7.92692	0.0979405	8.66257	0.0321402	5.85051	0.0564773	7.17255	0.0326294	7.50184	0.0647441	4.59715	0.0777481	4.49205	0.0626309	6.95964	0.0869458	6.89591	0.0652453	8.50499	0.0763794	5.93039	0.0738025	7.08847	0.0729883	7.70171	0.0868087	4.7868	0.0851064	4.8612
Total	99.6017	0.728313	99.0802	0.720572	99.4582	1.01025	98.155	0.394068	99.1926	0.673588	98.9651	0.485355	98.8008	0.64815	99.2627	0.727995	98.809	0.890765	98.5449	1.00315	99.574	0.766949	98.1702	0.451881	99.1329	0.540853	98.5868	0.583903	98.741	0.602556	98.7588	0.888485	97.5418	0.580168	97.6156	1.01605	97.7795	0.716602	97.8953	0.582427	98.2644	0.605939	98.2025	0.627611	97.8092	0.846014	98.6271	0.950105	97.7318
n	19		20		20		5		20		5		20		20		20		20		5		4		5		5		5		20		19		19		16		20		20		8		20		8		20
Qz	37.9663		40.8074		29.9377		40.9405		35.6978		36.2195		41.5583		30.0504		40.5524		42.7304		27.8653		41.059		35.3348		36.5083		43.5702		27.4743		37.2009		40.9537		33.1886		41.6682		36.6234		37.0271		41.3885		34.7235		35.9899
Ab	31.3753		10.772		19.7628		0		23.856		14.8374		5.65553		37.4275		29.6022		10.1245		19.5845		0		24.0161		14.6458		5.19141		40.3248		28.3823		9.98771		18.0664		0		21.5586		13.9877		5.10701		31.3298		28.148
Or	24.9815		41.6309		44.0439		50.8961		34.4177		42.9509		45.8852		28.1066		23.0643		39.8955		46.8479		51.1956		34.5764		42.3896		44.3357		27.1691		26.5479		41.1313		40.7547		50.2643		35.0484		41.8927		45.5169		28.2899		28.7296
An	3.1297		3.81511		3.59434		3.48941		3.45788		3.38235		3.57291		1.81776		3.86742		3.84098		3.55907		3.42037		3.50254		3.40063		3.42147		2.28932		2.91046		3.48768		3.40638		3.41487		2.73546		3.41633		3.57858		1.81628		2.41641
Cora	-0.121833		0.156185		0.219013		0.979873		-0.0349486		-0.0829407		0.386843		-0.0481548		0.0513085		0.126489		0.289185		0.963488		-0.0191403		0.208858		0.556675		-0.0767064		0.261842		0.305874		0.581283		1.10305		0.408457		0.401739		0.679889		0.47508		0.124865
n = number of analyses, Qz = normative quartz content calculated by CIPW-norm, Ab = albite , Or = orthoclase , An = anorthite, Cor = corundum
a negative corundum values reflect the amount of corundum that is missing to convert all available CaO to anorthite
[truncated: 15 more columns]

## Sheet: ApTable 3
Microprobe analyses of the composition of glasses in experimental conditions B
Name	YX1		YX2		YX3		YX4		YX5		YX6		YX7		YX8		YX9		YX10		YX11		YX12		YX13		YX14		YX15		YX16		YX17		YX18		YX19		YX20		YX21		YX22		YX23		YX24		YX25
SM	HYS1		HYS2		HYS3		HYS4		HYS5		HYS6		HYS7		HYS8		HYS1		HYS2		HYS3		HYS4		HYS5		HYS6		HYS7		HYS8		HYS1		HYS2		HYS3		HYS4		HYS5		HYS6		HYS7		HYS8		HYS1
	[wt.%]	1σ	[wt.%]	1σ	[wt.%]	1σ	[wt.%]	1σ	[wt.%]	1σ	[wt.%]	1σ	[wt.%]	1σ	[wt.%]	1σ	[wt.%]	1σ	[wt.%]	1σ	[wt.%]	1σ	[wt.%]	1σ	[wt.%]	1σ	[wt.%]	1σ	[wt.%]	1σ	[wt.%]	1σ	[wt.%]	1σ	[wt.%]	1σ	[wt.%]	1σ	[wt.%]	1σ	[wt.%]	1σ	[wt.%]	1σ	[wt.%]	1σ	[wt.%]	1σ	[wt.%]
SiO2	76.0864	0.33944	75.4503	0.213228	72.4726	0.259912	76.1865	0.291211	74.0791	0.354719	71.1331	0.376838	71.3014	0.246478	74.381	0.298882	76.8984	0.227407	75.5044	0.236545	71.7045	0.316744	76.3294	0.322426	73.3675	0.277263	71.0729	0.350831	71.0302	0.232723	73.7912	0.227779	76.7573	0.638539	75.6755	0.297671	71.0502	0.232217	76.3217	0.232081	73.1333	0.16808	70.57	0.258192	70.924	0.240261	74.0273	0.252535	76.5603
TiO2	0.421855	0.0195034	0.403255	0.0181319	0.492926	0.0194871	0.415047	0.0184104	0.43372	0.0170732	0.529228	0.0180028	0.463173	0.019183	0.457167	0.0192587	0.452406	0.0247686	0.401483	0.0139524	0.453913	0.0217969	0.422731	0.0162986	0.42301	0.0200022	0.499092	0.0266967	0.458268	0.0177402	0.452752	0.0168121	0.419044	0.0292828	0.440513	0.018129	0.449867	0.0204199	0.414725	0.0253781	0.426583	0.0156248	0.463912	0.0173761	0.438222	0.0147447	0.436344	0.0146631	0.397872
Al2O3	11.9756	0.107484	11.9039	0.0790068	13.8413	0.131467	11.7692	0.118152	13.1888	0.140102	14.3721	0.0931981	14.1896	0.147467	12.9356	0.120883	11.8212	0.110066	11.9531	0.088786	14.1251	0.0807202	11.8554	0.122544	13.2696	0.12391	15.0898	0.174174	14.6468	0.0773755	13.4642	0.0965696	12.2183	0.192627	12.035	0.0817265	14.722	0.104687	12.1268	0.091622	13.3219	0.0969127	15.5408	0.1173	15.0955	0.151033	14.0389	0.0868212	12.2727
FeO	2.29583	0.083085	2.12664	0.101827	1.79452	0.0952055	2.12248	0.0919307	1.52058	0.0798452	1.93062	0.265832	2.10123	0.0944549	1.87419	0.102971	1.97772	0.154581	2.01691	0.107528	1.74195	0.0782313	2.1087	0.0669036	1.62459	0.112645	1.56929	0.190455	2.00657	0.0882356	1.7312	0.0778712	1.66164	0.330472	1.88752	0.055118	1.65524	0.0736825	1.99062	0.0768315	1.69749	0.114514	1.68372	0.125589	1.70142	0.0865613	1.24267	0.0749581	1.8365
CaO	0.867182	0.0388281	1.39045	0.0268984	0.941466	0.0451293	0.930771	0.0274785	1.17068	0.0420637	0.841283	0.0554564	0.885907	0.0464374	0.888675	0.035056	1.00896	0.0435403	1.44232	0.0282156	1.06056	0.0263572	1.22538	0.052562	1.38368	0.0330795	0.900212	0.0484949	1.00466	0.0313503	1.03419	0.0226576	1.3926	0.151853	1.4522	0.0361134	1.37	0.0299913	1.43004	0.0324311	1.40616	0.0254587	1.01651	0.0297154	1.12553	0.0305942	1.12552	0.0442818	1.47145
Na2O	3.53368	0.111478	1.39185	0.0938082	2.2126	0.0803218	2.42829	0.0930521	1.81709	0.0984396	4.49679	0.0611723	3.45414	0.112615	4.01644	0.0892997	3.53038	0.0896172	1.38682	0.0628512	2.24206	0.0804832	2.50629	0.074926	1.80572	0.11511	4.79462	0.0815646	3.59253	0.105341	4.16453	0.0916674	3.65572	0.207326	1.45985	0.0675412	2.32671	0.104421	2.49467	0.104485	1.80755	0.0763041	5.03713	0.118815	3.67173	0.111468	4.29473	0.095456	3.78038
K2O	4.11428	0.0549392	6.67196	0.0738917	7.69636	0.0820905	5.65793	0.0724718	7.22709	0.074863	5.32616	0.043306	6.43666	0.0670331	4.35728	0.0724254	3.71791	0.074542	6.63623	0.0575552	7.65272	0.0741178	5.13414	0.061848	7.04843	0.0836655	5.24114	0.0723159	6.35642	0.0541306	4.22415	0.0436027	3.39841	0.101656	6.66007	0.094942	7.42174	0.0780784	4.95648	0.0669368	7.0436	0.0890714	5.06222	0.0703469	6.24413	0.0664007	4.1144	0.0603071	3.10077
Total	99.2948	0.754758	99.3384	0.606792	99.4517	0.713613	99.5102	0.712707	99.437	0.807106	98.6293	0.913805	98.8321	0.733669	98.9104	0.738777	99.407	0.724522	99.3413	0.595433	98.9808	0.678451	99.5821	0.717509	98.9225	0.765675	99.1671	0.944533	99.0955	0.606896	98.8623	0.57696	99.503	1.65176	99.6107	0.651241	98.9958	0.643497	99.735	0.629766	98.8366	0.585966	99.3743	0.737334	99.2006	0.701063	99.2799	0.629022	99.4199
n	17		20		15		20		20		14		17		16		18		20		20		17		20		16		16		17		31		10		18		20		20		19		19		17		20
Qz	36.388		37.5016		27.0443		37.032		32.4313		21.8112		23.3651		31.2648		38.7104		37.696		26.0294		38.1179		31.9218		20.359		22.3722		30.1203		38.4725		37.5112		25.1701		38.4767		31.5916		18.7427		22.2053		30.2024		38.3611
Ab	29.9023		11.7779		18.7232		20.5484		15.3763		38.0522		29.2292		33.9875		29.8744		11.7354		18.9725		21.2084		15.2802		40.5725		30.4003		35.2406		30.935		12.3534		19.6888		21.1101		15.2957		42.6246		31.0705		36.3423		31.9899
Or	24.3153		39.4311		45.4853		33.4383		42.7119		31.4775		38.0405		25.7514		21.9727		39.22		45.2274		30.3426		41.656		30.975		37.5663		24.9646		20.0845		39.3608		43.8623		29.2927		41.6275		29.9176		36.9027		24.316		18.3254
An	4.3022		6.52798		4.67073		4.50316		5.80789		3.30027		4.20277		4.39853		5.00556		6.79054		5.26158		5.93543		6.86463		4.1731		4.98424		5.13077		6.89261		6.61578		6.79676		7.09463		6.97613		4.84364		5.58392		5.58384		7.30003
Cora	0.132513		-0.135682		0.159057		-0.0419665		0.248372		-0.320092		-0.0704821		-0.00377558		0.154772		-0.133761		0.225067		-0.0527146		0.153987		-0.107363		0.0299892		0.160802		-0.00595563		-0.215761		0.370128		0.0579386		0.167645		-0.0730828		0.250224		0.474009		0.0222095
n = number of analyses, Qz = normative quartz content calculated by CIPW-norm, Ab = albite , Or = orthoclase , An = anorthite, Cor = corundum
a negative corundum values reflect the amount of corundum that is missing to convert all available CaO to anorthite
[truncated: 39 more columns]

## Sheet: Ap Table 4
Microprobe analyses of the composition of glasses in experimental conditions C
Name	YX57		YX58		YX59		YX60		YX61		YX62		YX63		YX64		YX73		YX74		YX75		YX76		YX77		YX78		YX79		YX80		YX81		YX83		YX84		YX85		YX86
SM	AC 7		AC 50		BA 5		BC 5		BC 25		C		DC 5		D		AC7		AC50		BA5		BC5		BC25		C		DC5		D		AC7		BA5		BC5		C		D
	[wt.%]	1σ	[wt.%]	1σ	[wt.%]	1σ	[wt.%]	1σ	[wt.%]	1σ	[wt.%]	1σ	[wt.%]	1σ	[wt.%]	1σ	[wt.%]	1σ	[wt.%]	1σ	[wt.%]	1σ	[wt.%]	1σ	[wt.%]	1σ	[wt.%]	1σ	[wt.%]	1σ	[wt.%]	1σ	[wt.%]	1σ	[wt.%]	1σ	[wt.%]	1σ	[wt.%]	1σ	[wt.%]	1σ
SiO2	74.6836	0.290561	74.4455	0.25209	74.4701	0.168331	74.565	0.310854	73.5379	0.230522	72.4719	0.204674	72.9515	0.195799	74.5298	0.410059	73.2971	0.268956	74.269	0.264475	73.9916	0.330539	74.0798	0.267651	73.9229	0.28421	73.182	0.189412	72.864	0.213035	74.1724	0.30547	75.7092	0.279356	76.129	0.332002	75.6331	0.185068	72.5833	0.223605	74.4765	0.280856
TiO2	0.203308	0.0129882	0.195823	0.014586	0.216077	0.0133702	0.196942	0.0157731	0.189397	0.0119582	0.20139	0.0139157	0.197311	0.0135615	0.210211	0.0208524	0.228049	0.0124807	0.207707	0.0160179	0.219939	0.0199341	0.202167	0.0116681	0.193509	0.015394	0.21183	0.0181091	0.205817	0.0176669	0.232058	0.0171873	0.212956	0.0199133	0.208988	0.0194921	0.195334	0.0165295	0.206303	0.0158487	0.196877	0.0128417
Al2O3	11.7195	0.107968	11.8865	0.117593	11.9575	0.102754	12.2457	0.099343	12.5098	0.104896	12.9063	0.104256	13.2551	0.103551	12.9296	0.107266	12.3785	0.127069	12.1681	0.115422	12.39	0.12374	12.5554	0.137144	12.6605	0.106113	12.5141	0.14523	13.172	0.132168	12.6974	0.133465	12.111	0.0869505	11.6502	0.117012	12.3287	0.125986	13.1502	0.087516	13.594	0.0815688
FeO	0.701591	0.0555581	0.582321	0.109766	0.69593	0.0597077	0.580814	0.0555069	0.703928	0.0552897	0.70174	0.0642729	0.692902	0.052517	0.720069	0.0574908	1.08985	0.03794	0.692631	0.0564703	0.775336	0.0772199	0.666911	0.0702629	0.65084	0.0429659	0.689997	0.109841	0.709547	0.115128	0.834386	0.105178	0.742378	0.0481723	0.786316	0.0680603	0.808612	0.0699207	0.788132	0.031236	0.727062	0.0676248
CaO	0.688722	0.0277217	0.664806	0.0215435	0.724597	0.0284353	0.676018	0.0187516	0.661117	0.0291544	0.674908	0.0229544	0.6832	0.0237534	0.499117	0.0203604	0.934116	0.021044	0.693608	0.0324368	0.773314	0.0395608	0.69512	0.0255936	0.669362	0.016452	0.724115	0.0290132	0.65772	0.0224001	0.439813	0.0201267	0.688345	0.0354262	0.691584	0.0430467	0.65044	0.0393003	0.668193	0.028892	0.632999	0.0277915
Na2O	1.66478	0.101171	1.68086	0.0865051	2.94976	0.102088	2.84627	0.128456	2.29999	0.0888634	1.80891	0.0982286	3.2744	0.089291	4.46031	0.181666	1.8783	0.0724587	1.65825	0.0819116	2.89775	0.117065	2.82696	0.120339	2.32145	0.115874	1.78235	0.0911934	3.22731	0.0889922	4.29392	0.113847	1.68565	0.0763625	2.70416	0.104826	2.75534	0.112039	1.79279	0.052321	4.69162	0.117389
K2O	6.88567	0.0927662	7.1375	0.111256	4.95056	0.0725009	5.45477	0.0671512	6.66851	0.0715146	7.83494	0.090563	5.55669	0.0645873	3.42663	0.0560837	6.52355	0.0838862	7.38706	0.070945	5.24056	0.0616593	5.71776	0.0568781	6.85445	0.0768933	7.45586	0.0824479	5.7548	0.0736091	3.72653	0.0501886	7.16925	0.07131	4.85408	0.0705537	5.48364	0.0476002	8.08283	0.041226	3.27371	0.0412452
Total	96.5472	0.688734	96.5933	0.713339	95.9646	0.547187	96.5655	0.695836	96.5706	0.592198	96.6001	0.598865	96.6111	0.54306	96.7757	0.853779	96.3295	0.623835	97.0764	0.637678	96.2885	0.769719	96.7441	0.689536	97.273	0.657902	96.5602	0.665248	96.5912	0.662999	96.3965	0.745463	98.3188	0.61749	97.0244	0.754993	97.8552	0.596444	97.2717	0.480645	97.5928	0.629317
n	20		20		20		20		20		20		20		20		20		20		20		20		10		19		20		19		19		20		10		10		20
Qz	36.7444		35.59		36.4001		35.349		32.7816		30.0888		30.7499		33.9652		34.6835		34.4486		34.9489		33.8635		32.358		32.3162		30.2258		33.4797		36.5385		39.8499		36.7066		29.2941		32.8491
Ab	14.0875		14.2235		24.9611		24.0854		19.4627		15.3072		27.7083		37.7435		15.8943		14.0323		24.521		23.922		19.6443		15.0824		27.3098		36.3355		14.2641		22.8828		23.3159		15.1708		39.7009
Or	40.6941		42.1824		29.2577		32.2376		39.4107		46.3043		32.8399		20.2513		38.554		43.6573		30.9716		33.7918		40.5096		44.064		34.0107		22.0237		42.3701		28.6875		32.4082		47.7693		19.3475
An	3.41684		3.29819		3.59482		3.35381		3.27989		3.3483		3.38944		2.47618		4.63427		3.44108		3.83651		3.44858		3.32079		3.59243		3.26303		2.18197		3.41497		3.43104		3.22691		3.31499		3.14039
Cor	0.275478		0.186876		0.429041		0.429944		0.306053		0.22278		0.611757		0.97562		0.529082		0.183206		0.544606		0.45204		0.205184		0.195087		0.437991		0.800416		0.326345		0.690193		0.67787		0.237045		1.18165
n = number of analyses, Qz = normative quartz content calculated by CIPW-norm, Ab = albite , Or = orthoclase , An = anorthite, Cor = corundum

## Sheet: Ap Table 5
Microprobe analyses of the composition of glasses in experimental condition D
Name	YX106		YX107		YX108		YX109		YX110		YX111		YX112		YX113		YX114		YX115		YX116		YX117		YX118		YX119		YX120		YX121		YX138		YX139		YX140		YX141		YX142		YX143		YX144		YX145		YX154
SM	HYW 1		HYW 2		HYW 3		HYW 4		HYW 5		HYW 6		HYW 7		HYW 8		HYW 1		HYW 2		HYW 3		HYW 4		HYW 5		HYW 6		HYW 7		HYW 8		HYW 1		HYW 2		HYW 3		HYW 4		HYW 5		HYW 6		HYW 7		HYW 8		HYW3+5
	[wt.%]	1σ	[wt.%]	1σ	[wt.%]	1σ	[wt.%]	1σ	[wt.%]	1σ	[wt.%]	1σ	[wt.%]	1σ	[wt.%]	1σ	[wt.%]	1σ	[wt.%]	1σ	[wt.%]	1σ	[wt.%]	1σ	[wt.%]	1σ	[wt.%]	1σ	[wt.%]	1σ	[wt.%]	1σ	[wt.%]	1σ	[wt.%]	1σ	[wt.%]	1σ	[wt.%]	1σ	[wt.%]	1σ	[wt.%]	1σ	[wt.%]	1σ	[wt.%]	1σ	[wt.%]
SiO2	76.7448	0.257917	76.5298	0.209355	73.0191	0.238017	76.4428	0.260348	76.1835	0.286932	75.9623	0.290042	76.5706	0.294716	74.4123	0.231436	77.4723	0.226413	76.7992	0.300869	76.4955	0.344665	76.81	0.248124	76.528	0.239036	76.0526	0.259966	77.7062	0.223575	74.1207	0.315667	75.588	0.34326	75.6567	0.27128	73.0352	0.225985	76.0386	0.222389	75.6825	0.300861	76.0103	0.299477	76.0486	0.291502	74.698	0.265099	75.1023
TiO2	0.251941	0.013139	0.238695	0.0131295	0.224845	0.0152134	0.221962	0.0197036	0.2232	0.0135444	0.22141	0.0153095	0.224662	0.0155786	0.227981	0.0160316	0.227532	0.0157018	0.226186	0.0167264	0.212193	0.0178442	0.199134	0.0147653	0.207562	0.0168713	0.198959	0.0132209	0.198835	0.0149986	0.207617	0.0156269	0.23381	0.0130534	0.227037	0.0152791	0.206212	0.0170117	0.207303	0.018074	0.208579	0.014854	0.206625	0.0162324	0.212173	0.0148823	0.224736	0.01618	0.211868
Al2O3	12.2942	0.0953453	11.5285	0.109339	13.8031	0.120648	11.5341	0.0557951	12.2135	0.0870616	12.069	0.0874433	11.1858	0.137773	13.9664	0.139847	11.7284	0.0775866	11.0628	0.0951487	11.5843	0.0894507	11.5735	0.105722	12.1776	0.116774	12.0805	0.112488	10.8952	0.0775303	14.1339	0.115873	12.5144	0.115598	11.8801	0.108694	13.8306	0.127232	11.9402	0.0918296	12.5817	0.108206	12.0561	0.097822	11.6592	0.113421	13.3392	0.130287	13.0433
FeO	0.68636	0.106858	0.840639	0.08	0.476068	0.0647687	0.446897	0.0557889	0.703466	0.084699	0.482817	0.11491	0.632048	0.058847	0.649517	0.070535	0.318332	0.0654764	0.72686	0.0627703	0.489353	0.0539629	0.398188	0.0595218	0.576746	0.0735077	0.494731	0.0936262	0.537679	0.0563401	0.562669	0.0604086	0.751229	0.126129	0.688309	0.133601	0.806357	0.0598102	0.484053	0.0632712	0.551448	0.126441	0.572389	0.205456	0.679615	0.0862393	0.894383	0.07867	0.915037
CaO	0.809562	0.0250618	0.804223	0.0290484	0.678692	0.0222868	0.673179	0.0189255	0.710237	0.0300986	0.680686	0.0223357	0.688871	0.0150219	0.619547	0.024547	0.781155	0.0252959	0.773358	0.0345791	0.666676	0.0224226	0.671178	0.0227667	0.710282	0.0334712	0.698055	0.0244983	0.692176	0.0161316	0.717583	0.0273051	0.825541	0.0271925	0.794701	0.0208414	0.704028	0.0224211	0.683664	0.0192244	0.708376	0.032394	0.692322	0.0351749	0.735243	0.0298664	0.501595	0.0204893	0.699532
Na2O	3.81917	0.0769579	1.2773	0.0732304	2.27637	0.0946422	0.049157	0.0333662	2.78815	0.100115	1.75797	0.0526989	0.623298	0.0693257	4.92769	0.115239	3.43778	0.0970754	1.16752	0.0617876	0.0594374	0.0314045	0.0646213	0.0342515	2.64952	0.0907944	1.66945	0.0408382	0.588462	0.0537577	4.75661	0.172629	3.68276	0.119234	1.24867	0.0616069	2.17641	0.0967577	0.053663	0.0328752	2.75977	0.111515	1.63969	0.0795789	0.613719	0.0612006	4.29073	0.0952836	2.38084
K2O	4.1582	0.0776619	7.10987	0.0707786	7.93103	0.0855842	8.65676	0.0696375	5.73696	0.0647759	7.1932	0.0719456	7.70837	0.0788566	4.42825	0.045133	3.9629	0.0683322	6.76404	0.0911018	8.55003	0.0839206	8.64352	0.0875067	5.73667	0.0702212	7.13601	0.0797092	7.48608	0.0685281	4.32901	0.0567622	4.28582	0.058415	7.37361	0.0823613	7.77546	0.0870754	8.88884	0.0810943	5.91907	0.0877808	7.12352	0.100755	8.00736	0.0789505	4.57364	0.0817079	6.85662
Total	98.7642	0.652941	98.329	0.584881	98.4093	0.64116	98.0249	0.513565	98.559	0.667227	98.3673	0.654686	97.6337	0.670118	99.2317	0.642769	97.9284	0.575881	97.5199	0.662983	98.0575	0.643671	98.3601	0.572658	98.5864	0.640676	98.3303	0.624347	98.1045	0.510862	98.8281	0.764272	97.8816	0.802881	97.8692	0.693663	98.5343	0.636292	98.2963	0.528758	98.4115	0.782052	98.301	0.834496	97.9559	0.676061	98.5223	0.687717	99.2095
n	17		20		20		20		20		20		20		17		17		20		19		20		20		20		20		20		20		20		20		20		20		20		20		19		15
Qz	36.5027		39.654		27.7393		41.3741		36.0735		36.5098		41.6121		27.142		40.5336		42.0336		41.7481		41.7281		37.3153		37.2704		43.8503		28.0346		35.5511		38.0717		28.5994		39.992		35.1554		37.4049		39.8546		30.5955		32.9211
Ab	32.3181		10.8086		19.2629		0.415971		23.5936		14.8761		5.2744		41.6985		29.0908		9.87964		0.502965		0.546831		22.4205		14.127		4.97961		40.2508		31.1638		10.5663		18.417		0.454101		23.3534		13.8752		5.19334		36.3086		20.1469
Or	24.5749		42.0192		46.8722		51.1613		33.9053		42.5116		45.5563		26.1708		23.4206		39.9753		50.5305		51.083		33.9036		42.1736		44.2425		25.5843		25.3291		43.5779		45.9528		52.5328		34.9816		42.0998		47.3233		27.0301		40.5224
An	4.01634		3.98985		3.36708		3.33972		3.52358		3.37697		3.41758		2.91129		3.87541		3.83673		3.30746		3.3298		3.5238		3.46314		3.43397		3.56002		4.09561		3.94261		3.49277		3.39174		3.51434		3.4347		3.64763		2.48848		3.47047
Cora	0.0386923		0.269219		0.239707		0.859077		0.125742		0.15335		0.564299		-0.0595003		0.363294		0.414563		1.01966		0.890923		0.318103		0.340821		0.565554		0.318623		0.316088		0.39978		0.553957		0.987441		0.346912		0.389394		0.645471		0.418126		0.433077
n = number of analyses, Qz = normative quartz content calculated by CIPW-norm, Ab = albite , Or = orthoclase , An = anorthite, Cor = corundum
a negative corundum values reflect the amount of corundum that is missing to convert all available CaO to anorthite
[truncated: 31 more columns]

## Sheet: Ap Table 6
Microprobe analyses of the composition of glasses in experimental condition E
Name	YX33		YX34		YX35		YX36		YX37		YX38		YX39		YX40		YX41		YX42		YX43		YX44		YX45		YX46		YX47		YX48		YX49		YX50		YX51		YX52		YX53		YX54		YX55		YX56		YX65
SM	HYS1		HYS2		HYS3		HYS4		HYS5		HYS6		HYS7		HYS8		HYS1		HYS2		HYS3		HYS4		HYS5		HYS6		HYS7		HYS8		HYS1		HYS2		HYS3		HYS4		HYS5		HYS6		HYS7		HYS8		HYS17
	[wt.%]	1σ	[wt.%]	1σ	[wt.%]	1σ	[wt.%]	1σ	[wt.%]	1σ	[wt.%]	1σ	[wt.%]	1σ	[wt.%]	1σ	[wt.%]	1σ	[wt.%]	1σ	[wt.%]	1σ	[wt.%]	1σ	[wt.%]	1σ	[wt.%]	1σ	[wt.%]	1σ	[wt.%]	1σ	[wt.%]	1σ	[wt.%]	1σ	[wt.%]	1σ	[wt.%]	1σ	[wt.%]	1σ	[wt.%]	1σ	[wt.%]	1σ	[wt.%]	1σ	[wt.%]
SiO2	75.6992	0.342153	75.1645	0.375223	71.7125	0.484663	75.3594	0.43376	73.3474	0.537943	70.8605	0.315629	71.1432	0.46369	73.8747	0.414006	74.2787	0.25895	73.9648	0.273254	71.1991	0.274059	73.8019	0.233327	73.1953	0.239146	70.0801	0.343171	71.2061	0.379415	73.5259	0.326794	75.6675	0.447421	75.4751	0.168942	71.5253	0.177375	75.5874	0.276715	72.8316	0.211758	69.828	0.202967	70.5794	0.298058	72.6592	0.21702	75.0119
TiO2	0.443574	0.0571273	0.40474	0.0363348	0.42385	0.0401962	0.422013	0.0427832	0.424723	0.0356433	0.448785	0.0312469	0.453374	0.0344819	0.424842	0.0250731	0.502112	0.0251936	0.421682	0.0161986	0.462274	0.0195648	0.456832	0.0194548	0.429978	0.0223681	0.497898	0.0251369	0.50318	0.0230191	0.460451	0.0276937	0.456063	0.0269989	0.428212	0.0166632	0.454765	0.0147341	0.432949	0.0185028	0.403032	0.0213119	0.452007	0.0189105	0.452838	0.0154862	0.423984	0.0194676	0.45235
Al2O3	12.8383	0.259655	12.2467	0.291173	14.8665	0.277138	12.6793	0.205239	13.4345	0.321506	15.5067	0.199295	15.0574	0.264696	13.9425	0.313468	12.6069	0.0655548	12.4373	0.101417	14.1367	0.11876	12.5088	0.141264	13.3122	0.135315	14.8184	0.266084	14.3529	0.106484	13.1886	0.208995	12.6823	0.112595	12.0426	0.113548	14.774	0.0962077	12.3454	0.0976563	13.2288	0.0946407	15.9259	0.155764	15.3663	0.109912	14.3266	0.10465	11.6095
FeO	1.68571	0.183975	1.83238	0.179467	1.10085	0.101984	1.62819	0.239571	1.5186	0.187635	0.95126	0.332527	1.17905	0.178229	1.13888	0.115222	2.10543	0.150446	1.6639	0.113145	1.21167	0.161921	1.97237	0.120286	0.862758	0.0572251	1.83149	0.343143	1.4198	0.175634	1.4338	0.261771	1.1096	0.253208	1.18737	0.085023	0.894835	0.0590853	1.29553	0.0716393	1.30869	0.0426315	1.09435	0.0677543	0.804883	0.0924953	0.993931	0.066836	1.6038
CaO	1.18311	0.0995543	1.43665	0.118356	1.35328	0.0956718	1.35294	0.0988208	1.40025	0.0965727	1.03837	0.0630935	1.11727	0.116298	1.20443	0.0788598	1.0003	0.04516	1.50386	0.0298876	1.11133	0.0411404	1.20057	0.0505261	1.31338	0.0395212	1.01242	0.0803205	0.980078	0.044226	1.06382	0.0632526	1.34234	0.0507054	1.46154	0.045982	1.3963	0.0360359	1.44327	0.0351207	1.43273	0.0306314	1.20366	0.0361782	1.26277	0.0367656	1.40178	0.0304096	1.58402
Na2O	3.89534	0.14489	1.4418	0.11492	2.44891	0.166137	2.75487	0.134174	1.9509	0.132316	5.3132	0.208967	3.90872	0.181696	4.50924	0.207598	3.7979	0.152518	1.53626	0.0551099	2.29293	0.103863	2.6539	0.104045	1.90794	0.0700104	4.9542	0.224783	3.66966	0.135745	4.30585	0.118395	3.88097	0.139289	1.45253	0.106523	2.37971	0.0734362	2.71315	0.0890455	1.95978	0.0986323	5.32783	0.183358	3.98886	0.132515	4.66231	0.124712	0.770432
K2O	3.84163	0.106512	6.75246	0.108433	7.40871	0.11776	5.35945	0.115332	6.99396	0.105816	5.04277	0.0859941	6.29074	0.096638	4.11414	0.0589715	4.31999	0.0683607	6.88937	0.0776686	7.48173	0.0649474	5.80317	0.0834366	7.06654	0.0970833	5.08203	0.140527	6.28066	0.0810673	4.23487	0.0736397	3.49563	0.0881506	6.5949	0.0601846	7.2562	0.061533	5.04574	0.0502189	6.93536	0.0592922	4.81372	0.0689223	6.06014	0.0927752	3.89628	0.0774565	7.01842
Total	99.5868	1.19387	99.2792	1.22391	99.3146	1.28355	99.5562	1.26968	99.0704	1.41743	99.1615	1.23675	99.1498	1.33573	99.2087	1.2132	98.6113	0.766183	98.4172	0.66668	97.8958	0.784255	98.3975	0.752338	98.0881	0.660668	98.2766	1.42316	98.4124	0.94559	98.2133	1.08054	98.6343	1.11837	98.6423	0.596866	98.6811	0.518408	98.8635	0.638899	98.1	0.558898	98.6455	0.733854	98.5152	0.778008	98.3641	0.640551	98.0504
n	19		19		18		17		17		15		18		18		20		20		20		16		10		13		25		25		20		10		10		20		10		20		20		20		20
Qz	34.7687		36.7021		25.6318		34.9863		31.3165		18.3291		21.4407		28.7782		32.2635		34.5712		26.2049		32.5173		31.852		18.9291		23.1014		29.4158		36.2746		38.0913		26.5269		36.792		31.1186		17.4199		21.1854		27.1932		39.3923
Ab	32.9627		12.2006		20.7229		23.3119		16.5087		44.9608		33.076		38.1575		32.1381		12.9999		19.4029		22.4575		16.1451		41.9228		31.053		36.4365		32.8411		12.2915		20.1373		22.9589		16.5838		45.0846		33.7541		39.4528		6.51946
Or	22.7039		39.9069		43.7853		31.6742		41.3341		29.8027		37.1781		24.3144		25.531		40.716		44.2168		34.2966		41.7631		30.0347		37.1185		25.028		20.6591		38.9757		42.884		29.8202		40.9878		28.449		35.8153		23.0269		41.4787
An	5.86955		7.00149		6.71379		6.40229		6.94683		3.56856		4.96124		5.65218		4.5927		6.6932		5.51345		5.07954		6.51583		3.18618		4.14168		4.15139		6.65953		6.8618		6.92722		6.60502		6.8161		5.32344		6.12554		6.65668		7.49073
Cora	0.121002		-0.0461394		0.358147		-0.113541		0.108964		-0.580102		-0.213171		-0.118431		-0.135562		-0.281326		0.24583		-0.321262		0.136665		-0.673046		-0.264086		-0.41277		0.0736143		-0.142591		0.466332		-0.203471		-0.106956		-0.237504		-0.0510221		-0.109114		-0.134793
n = number of analyses, Qz = normative quartz content calculated by CIPW-norm, Ab = albite , Or = orthoclase , An = anorthite, Cor = corundum
a negative corundum values reflect the amount of corundum that is missing to convert all available CaO to anorthite
[truncated: 21 more columns]

## Sheet: Ap Table 7
Microprobe analyses of the composition experimentally derived feldspars (all systems)
Name	YX1	YX2	YX3	YX4	YX5	YX6	YX7	YX8	YX9	YX11	YX12	YX13	YX14	YX15	YX16	YX17	YX19	YX22	YX23	YX24	YX30	YX31	YX35	YX38	YX39	YX40	YX41	YX43	YX46	YX47	YX48	YX49	YX54	YX55	YX56	YX62	YX64	YX73	YX74	YX78	YX79	YX80	YX86	YX87	YX88	YX89	YX92	YX105	YX113
SiO2	63.0585	53.8122	58.251	59.958	55.1265	64.053	62.1617	62.283	61.1117	57.6752	57.3665	53.7763	63.8589	62.1001	62.7723	58.521	55.0235	62.7763	60.8339	60.8618	62.2231	58.145	56.7322	64.1154	61.4848	62.849	62.824	58.8859	64.8791	63.5058	64.3009	59.2454	63.6073	59.9736	60.4251	65.3456	65.5313	65.4666	65.7135	65.7693	63.4322	66.3958	63.5395	64.6253	64.8309	64.9984	64.8635	64.2376	64.422
TiO2	<0.05	0.0463097	0.0670469	0.0636137	<0.05	0.09324	0.0784554	0.0627013	0.0739906	0.064309	0.0488214	<0.05	0.0963078	0.0952083	0.0760983	0.0655328	0.0644998	0.0861181	0.10054	0.074708	0.0883881	0.0545811	0.0606336	0.0823528	0.0698451	0.0838804	0.0886164	0.0659389	0.0839189	0.0687683	0.0689982	0.0451087	0.0918434	0.0521123	0.0470118	<0.05	<0.05	<0.05	<0.05	<0.05	<0.05	<0.05	<0.05	0.0721502	0.0668175	0.206681	0.0467817	<0.05	<0.05
Al2O3	22.2985	28.3935	25.3444	24.4161	27.7121	21.681	22.8256	23.1703	23.902	25.7477	26.1523	28.5977	22.1694	22.8274	22.7749	25.6428	27.8591	22.7611	23.8187	24.0279	23.1702	25.9233	26.8822	21.7734	23.5998	22.8098	23.0037	24.8811	21.0572	21.7109	21.4965	25.2637	22.0677	24.6806	24.4096	18.7012	21.394	18.5717	18.3918	18.2395	22.0528	20.7233	22.7969	19.1018	18.5015	18.4952	19.2886	22.2543	22.1415
FeO	0.648337	0.704028	0.555886	0.48988	0.58905	0.351648	0.37971	0.431428	0.465982	0.3898	0.584788	0.540779	0.304693	0.38394	0.422202	0.433699	0.297755	0.288278	0.492428	0.400861	0.265184	0.241257	<0.20	0.197774	0.237688	0.294564	<0.20	0.316704	0.307808	0.251883	0.333526	0.323548	<0.20	0.196279	0.213424	<0.20	0.297315	<0.20	<0.20	<0.20	0.247288	<0.20	<0.20	0.21307	0.313265	0.389491	<0.20	<0.20	<0.20
CaO	5.65491	12.716	8.00155	7.93252	11.0554	3.14286	4.6879	5.52489	6.71228	9.03857	9.74571	12.3288	3.60791	5.24497	5.36119	8.64881	11.0703	4.41747	6.51058	6.67634	5.24376	8.33896	9.90596	3.5037	5.55892	5.10169	5.21409	7.58898	2.82221	3.88595	4.19021	8.1947	4.06024	6.94393	6.87073	0.178865	2.97206	0.305907	0.137363	0.133664	3.68313	2.30543	4.15221	0.834319	0.36037	0.363708	0.997081	3.58578	3.48763
Na2O	7.29955	3.36056	5.03401	5.79985	4.20345	8.30564	6.90606	7.55314	7.02553	4.96095	5.30117	3.66356	7.9917	6.80251	7.54204	6.24781	4.38155	8.08209	6.32691	7.10737	7.70964	6.19717	4.61998	8.27196	6.83808	7.69257	7.75166	5.0265	8.24503	6.75624	8.20723	6.4046	8.20931	6.64529	7.31194	1.23415	8.80368	1.67973	1.20975	1.27043	7.10421	9.34614	8.62465	1.97213	0.674239	1.03017	2.58016	8.34403	8.38104
K2O	1.04017	0.967394	2.74612	1.34	1.27805	2.37262	2.96057	0.974499	0.708535	2.12345	0.80075	1.05395	1.97106	2.54579	1.05126	0.440308	1.30332	1.58864	1.91689	0.851005	1.29973	1.09977	1.71076	2.05546	2.21088	1.16844	1.11791	3.23494	2.60471	3.82043	1.40272	0.522874	1.77143	1.50816	0.72214	14.3921	0.968659	13.9639	14.4005	14.3811	3.46636	1.09352	0.664514	13.1813	15.2529	14.5164	12.1227	1.35047	1.42834
n	1	3	3	1	3	3	3	3	1	3	2	3	5	3	1	5	3	5	4	2	5	5	3	6	4	2	2	4	5	3	2	1	3	4	3	5	1	5	2	5	1	2	5	4	3	1	5	2	3
An	28.1305	63.7426	39.2607	39.6166	54.7743	14.9678	22.6361	27.1453	33.1159	43.9961	48.0275	60.9941	17.6717	25.4787	26.4611	42.2328	53.8681	21.1018	32.1639	32.487	25.2804	39.9709	48.7906	16.7484	27.0307	24.9922	25.3452	36.9537	13.54	18.8085	20.231	40.1567	19.3118	33.441	32.7771	0.914997	14.8186	1.53171	0.705423	0.683508	17.8223	11.2351	20.2052	4.15139	1.82545	1.86404	4.96061	17.6702	17.1346
Ab	65.7086	30.4835	44.6962	52.4152	37.6862	71.5783	60.343	67.1539	62.722	43.6972	47.274	32.7976	70.8332	59.7967	67.361	55.2072	38.5809	69.8625	56.5607	62.5826	67.2589	53.7526	41.1768	71.5529	60.1691	68.1925	68.1846	44.2909	71.5809	59.1747	71.7053	56.7925	70.6564	57.9111	63.1211	11.4244	79.4308	15.2195	11.2421	11.7559	62.2065	82.4198	75.9448	17.757	6.1803	9.55398	23.2287	74.406	74.5101
Or	6.16088	5.77388	16.0431	7.96813	7.5394	13.4539	17.0209	5.70082	4.16211	12.3067	4.6985	6.20828	11.495	14.7246	6.17792	2.55998	7.55102	9.03564	11.2754	4.93047	7.46069	6.27652	10.0326	11.6987	12.8002	6.81529	6.4701	18.7554	14.8791	22.0168	8.06373	3.05076	10.0318	8.64785	4.1018	87.6606	5.75052	83.2488	88.0525	87.5606	19.9713	6.34506	3.8501	78.0916	91.9942	88.582	71.8107	7.92374	8.35528
Formula
Si	2.80027	2.44319	2.6297	2.68462	2.49556	2.84983	2.78193	2.76917	2.72337	2.60376	2.58128	2.44131	2.83561	2.77735	2.7889	2.62245	2.49241	2.79419	2.72301	2.71567	2.77068	2.6123	2.56008	2.8487	2.74817	2.79234	2.79017	2.65816	2.88274	2.84048	2.85206	2.64959	2.82846	2.68534	2.69783	2.99627	2.88694	2.99913	3.01098	3.01446	2.83171	2.92129	2.81066	2.96275	2.98878	2.99135	2.96086	2.84172	2.8491
Al	1.16705	1.51933	1.34847	1.28845	1.47854	1.13688	1.20393	1.21414	1.25537	1.36996	1.3869	1.53009	1.16021	1.20324	1.19255	1.3543	1.48728	1.19401	1.25654	1.26359	1.21596	1.37264	1.4297	1.14016	1.24319	1.19439	1.20409	1.32372	1.1027	1.14449	1.12374	1.33161	1.15652	1.30242	1.28444	1.01062	1.1108	1.00273	0.993194	0.985271	1.16027	1.0746	1.18849	1.0321	1.00525	1.00318	1.03771	1.16027	1.15408
Fe	0.0240776	0.0267315	0.0209867	0.0183434	0.0223006	0.0130841	0.0142112	0.0160415	0.0173663	0.0147167	0.0220055	0.0205309	0.0113147	0.0143601	0.015687	0.0162532	0.0112794	0.0107307	0.0184333	0.0149583	0.00987501	0.00906455	0.00333059	0.00734868	0.00888462	0.0109448	0	0.0119559	0.0114376	0.00942176	0.0123717	0.0121009	0.00714573	0.0073497	0.00796885	0.00462725	0.0109537	0	0.00459579	0.00647548	0.00923204	0.00499752	0.00703176	0.00816905	0.0120775	0.0149906	0.00386026	0.00683608	0.00387271
Z	3.99139	3.98926	3.99915	3.99141	3.9964	3.99979	4.00007	3.99935	3.99611	3.98843	3.99019	3.99194	4.00713	3.99495	3.99714	3.993	3.99097	3.99893	3.99798	3.99421	3.99651	3.994	3.99311	3.99621	4.00025	3.99768	3.99426	3.99384	3.99687	3.99439	3.98816	3.9933	3.99213	3.99511	3.99024	4.01152	4.00869	4.00185	4.00877	4.00621	4.00121	4.00089	4.00618	4.00302	4.0061	4.00953	4.00243	4.00883	4.00705
Ca	0.269064	0.618588	0.387035	0.380557	0.536235	0.149823	0.224789	0.263195	0.320498	0.437205	0.469856	0.599691	0.171654	0.251336	0.255211	0.415264	0.537285	0.210672	0.312245	0.319186	0.250179	0.401417	0.478953	0.166796	0.266219	0.242861	0.248117	0.367051	0.134357	0.186229	0.199136	0.392671	0.193449	0.333133	0.32868	0.00878746	0.140287	0.0150154	0.00674369	0.00656407	0.176169	0.108683	0.196796	0.0409825	0.0178005	0.0179346	0.0487665	0.16996	0.165263
Na	0.628491	0.295826	0.440619	0.503499	0.368944	0.716472	0.59924	0.65111	0.607027	0.434234	0.462483	0.322464	0.688036	0.589867	0.649682	0.542837	0.38481	0.697477	0.549088	0.614877	0.665602	0.539823	0.404213	0.712589	0.592593	0.662657	0.667492	0.43993	0.710295	0.585908	0.705806	0.555344	0.707776	0.5769	0.632961	0.109718	0.751969	0.149198	0.107472	0.112897	0.614897	0.797285	0.739695	0.175297	0.0602659	0.0919223	0.228356	0.715672	0.71865
K	0.0589278	0.0560324	0.158154	0.0765417	0.07381	0.134668	0.169027	0.0552739	0.0402812	0.122296	0.0459656	0.0610394	0.111656	0.145251	0.0595846	0.0251716	0.0753146	0.0902079	0.109461	0.0484421	0.073832	0.0630334	0.098485	0.116507	0.126066	0.0662273	0.063339	0.186292	0.147645	0.217996	0.0793724	0.0298318	0.100491	0.0861483	0.0411317	0.841876	0.05444	0.816093	0.841762	0.840889	0.197411	0.0613787	0.0374996	0.77092	0.897061	0.852279	0.705953	0.0762142	0.0805867
X	0.956483	0.970446	0.985809	0.960598	0.97899	1.00096	0.993056	0.969579	0.967807	0.993735	0.978305	0.983195	0.971346	0.986455	0.964477	0.983273	0.997409	0.998357	0.970794	0.982505	0.989613	1.00427	0.981652	0.995891	0.984878	0.971745	0.978948	0.993273	0.992297	0.990133	0.984314	0.977847	1.00172	0.996182	1.00277	0.960381	0.946697	0.980306	0.955978	0.960351	0.988477	0.967346	0.973991	0.9872	0.975128	0.962136	0.983075	0.961846	0.9645
Total	4.94788	4.9597	4.98496	4.95201	4.97539	5.00076	4.99313	4.96893	4.96391	4.98217	4.96849	4.97513	4.97848	4.98141	4.96161	4.97628	4.98838	4.99729	4.96878	4.97672	4.98612	4.99828	4.97476	4.9921	4.98512	4.96943	4.9732	4.98711	4.98917	4.98452	4.97248	4.97115	4.99384	4.9913	4.99301	4.9719	4.95539	4.98216	4.96474	4.96656	4.98969	4.96824	4.98017	4.99022	4.98123	4.97166	4.98551	4.97067	4.97155
Quality
X deviation [%]	4.35172	2.9554	1.41915	3.94023	2.10104	0.0963115	0.694391	3.04208	3.21934	0.626489	2.16955	1.68054	2.86538	1.35448	3.55229	1.67269	0.25909	0.16432	2.92059	1.74952	1.03871	0.427343	1.83484	0.410862	1.51221	2.82552	2.1052	0.67269	0.770279	0.986659	1.56856	2.21528	0.171529	0.381838	0.277202	3.96186	5.33034	1.96942	4.40225	3.96495	1.15229	3.2654	2.60088	1.28004	2.48723	3.78642	1.69247	3.81536	3.54999
Z deviation [%]	0.215149	0.26857	0.021182	0.21475	0.0899002	0.00514144	0.00186988	0.01621	0.0972951	0.289169	0.24537	0.201623	0.178255	0.126207	0.071575	0.174875	0.225838	0.0267892	0.0503881	0.144666	0.0872326	0.149915	0.17237	0.0948749	0.00613465	0.0579126	0.143614	0.154068	0.0782543	0.140323	0.295897	0.167552	0.196842	0.122151	0.244009	0.288004	0.217306	0.0462752	0.219178	0.1552	0.0303507	0.0223364	0.154591	0.0755521	0.152473	0.238126	0.0607785	0.220648	0.176176
tot cation dev. [%]	1.04246	0.805936	0.300775	0.959846	0.492128	0.0151492	0.137382	0.621384	0.721704	0.356633	0.630205	0.497406	0.430472	0.371862	0.767717	0.474438	0.232489	0.0542954	0.624428	0.465638	0.277527	0.0344633	0.504863	0.158072	0.297534	0.611434	0.535931	0.257792	0.216659	0.30959	0.550429	0.577099	0.123168	0.174088	0.139767	0.561969	0.892223	0.356865	0.705107	0.66883	0.206177	0.635211	0.396504	0.195566	0.375467	0.566783	0.289871	0.586554	0.569057
1σ
SiO2		0.688646	0.851042		0.574242	0.204438	0.08621	0.709426	0	0.326513	0.508561	0.352186	0.426448	0.304384	0	0.630895	0.398018	0.779119	0.573511	0.17002	0.185945	0.374166	0.49485	0.397545	0.228544	0.162339	0.0682119	0.567918	0.553514	0.398998	0.262134		0.223943	0.76684	0.131791	0.196569		0.258959	0.213118	0.151755		0.490805	0.229823	0.271989	0.35484		0.577176	0.102036	0.272873
TiO2		0.00556492	0.00668885		0.0118371	0.0117603	0.00162434	0.0131192	0	0.0137026	0.00229401	0.0226828	0.00727483	0.0123592	0	0.0172371	0.00782674	0.0176838	0.034441	0.00620425	0.0353547	0.0105211	0.0113402	0.0281893	0.0122422	0.0254237	0.0103137	0.00635374	0.0216866	0.00102089	0.00915		0.0070432	0.00784709	0.0108644	0.012247		0.0240753	0.0100653	0.0131249		0	0.00787587	0.0160305	0.0120472		0.0140056	0.0119343	0.0105285
Al2O3		0.391467	0.540552		0.192237	0.0390752	0.374484	0.599819	0	0.635722	0.156055	0.36457	0.188558	0.0836187	0	0.57891	0.19316	0.347214	0.812659	0.300018	0.441186	0.25283	0.292053	0.457874	0.265581	0.624522	0.231592	0.468166	0.505182	0.145308	0.176403		0.230662	0.327261	0.229918	0.115155		0.290437	0.066131	0.183906		0.0884259	0.217677	0.103897	0.100856		0.361287	0.0320053	0.031875
FeO		0.0736485	0.104498		0.0936363	0.0453394	0.0161266	0.0680192	0	0.0291705	0.00175652	0.0388522	0.0796903	0.0185045	0	0.0328502	0.0561238	0.047344	0.0664731	0.0109117	0.0678009	0.0387895	0.04741	0.0586302	0.0317093	0.0737676	0	0.012422	0.0947119	0.0532393	0.01782		0.0368788	0.0198973	0.0691896	0.0396082		0	0.0066728	0.0364972		0.138053	0.0260907	0.0411741	0.039474		0.0241837	0.0013072	0.00967732
CaO		0.359996	0.37985		0.25563	0.14795	0.0528749	0.886753	0	0.370076	0.341873	0.296628	0.152979	0.196784	0	0.435459	0.202628	0.265082	0.671305	0.0377148	0.308092	0.288835	0.331426	0.25841	0.319533	0.00383632	0.0309004	0.304578	0.265738	0.341018	0.0410139		0.173185	0.123137	0.235038	0.016056		0.0305587	0.00944054	0.0376289		0.346619	0.114214	0.0850424	0.0286169		0.445804	0.090967	0.233681
Na2O		0.0949543	0.123535		0.206535	0.0815368	0.119766	0.391406	0	0.0675628	0.0850848	0.13386	0.0901755	0.23354	0	0.120379	0.217202	0.113805	0.107823	0.061756	0.20889	0.160755	0.177312	0.246195	0.116772	0.236676	0.092773	0.263005	0.248627	0.0538527	0.158543		0.138247	0.108403	0.111515	0.0192675		0.0386925	0.0314275	0.0344948		0.219853	0.101605	0.0388038	0.0535243		0.241894	0.0787241	0.103651
K2O		0.0801813	0.359557		0.0911113	0.0459759	0.0589587	0.195733	0	0.21319	0.0374673	0.0750186	0.0963392	0.070023	0	0.0828125	0.0440366	0.178795	0.339729	0.0445241	0.133145	0.0625097	0.0680181	0.158438	0.128306	0.0987963	0.0249134	0.271603	0.24898	0.275168	0.0202004		0.100084	0.130592	0.0439139	0.0780307		0.0497501	0.0436797	0.0982365		0.0627487	0.0127536	0.147475	0.134935		0.675239	0.0273332	0.042366
Total		1.69446	2.36572		1.42523	0.576076	0.710045	2.86428	0	1.65594	1.13309	1.2838	1.04147	0.919213	0	1.89854	1.119	1.74904	2.60594	0.631149	1.38041	1.18841	1.42241	1.60528	1.10269	1.22536	0.458704	1.89405	1.93844	1.2686	0.685265		0.910042	1.48398	0.832231	0.476934		0.692473	0.380535	0.555643		1.3465	0.710039	0.704413	0.724294		2.33959	0.344307	0.704652
n = number of analyses
An = anorthite component, Ab = albite component, Or= orthoclase component
[truncated: 21 more columns]
