# Supplementary figures and images for: The Effect of Anorthite Content and Water on Quartz–Feldspar Cotectic Compositions in the Rhyolitic System and Implications for Geobarometry
Source: Oxford University Press journal article supplement (doi:10.1093/petrology/egx034), 2017-04-01

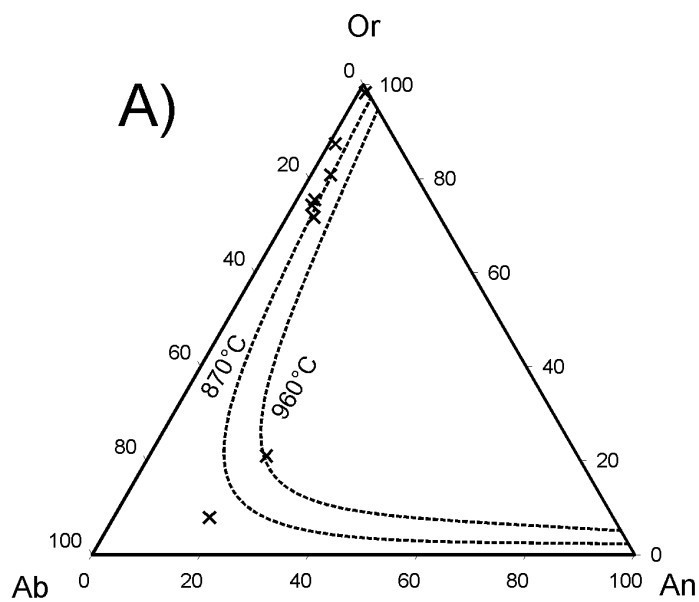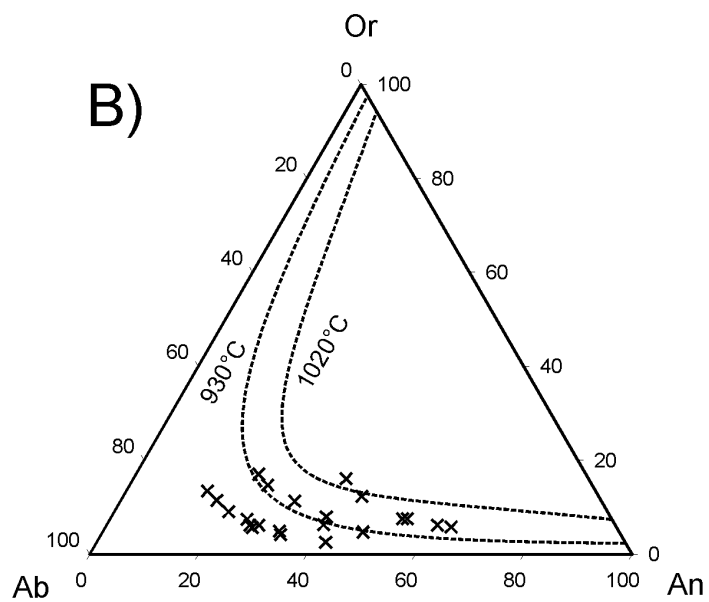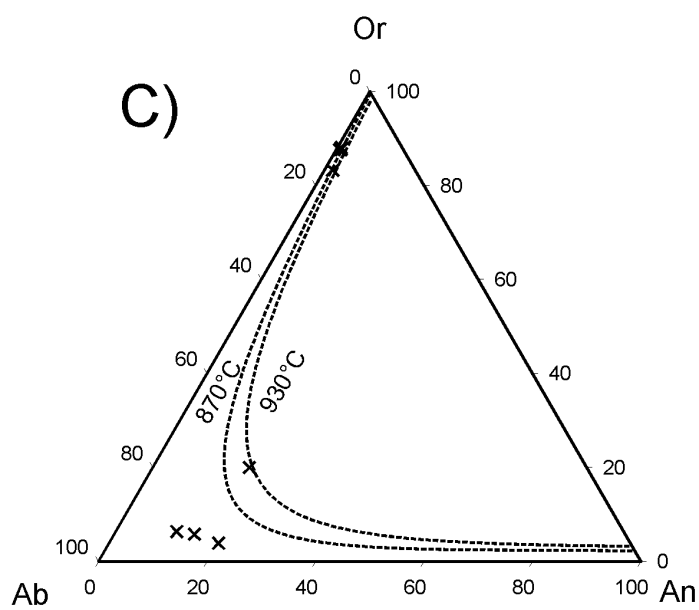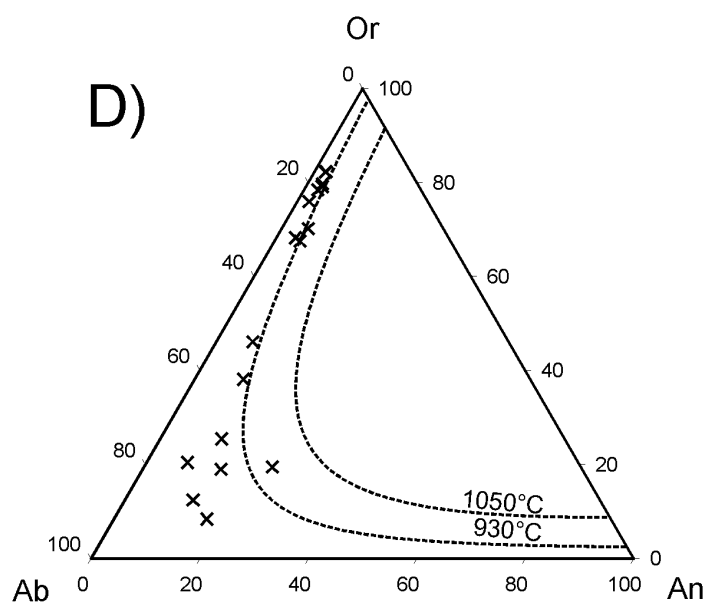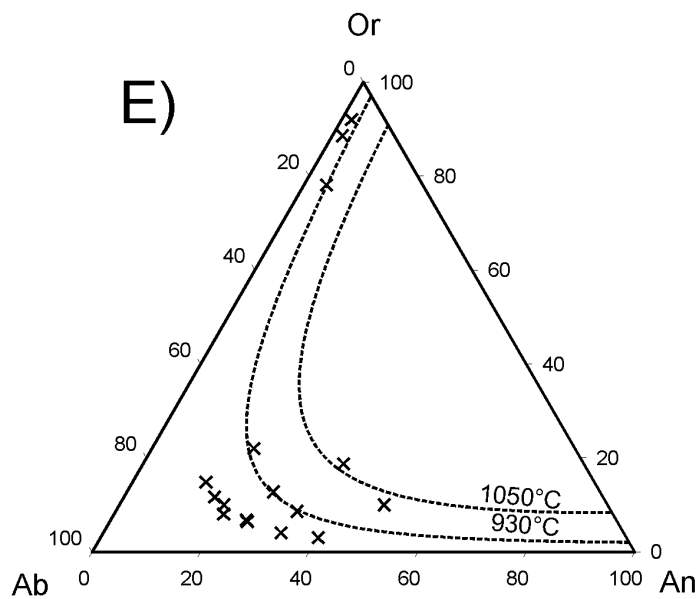

Supplement: Appendix_Figure_feldspar_ternary_egx034.pdf [file Appendix_Figure_feldspar_ternary_egx034.pdf]
